# Supplementary material
Source: Springer Nature journal article supplement (http://www.springermedizin.de/resource/supplementary/12955_2009_585_MOESM6_ESM.pdf/9560762)

Health Status Questionnaire SF-36  
Bodily Pain Component Score

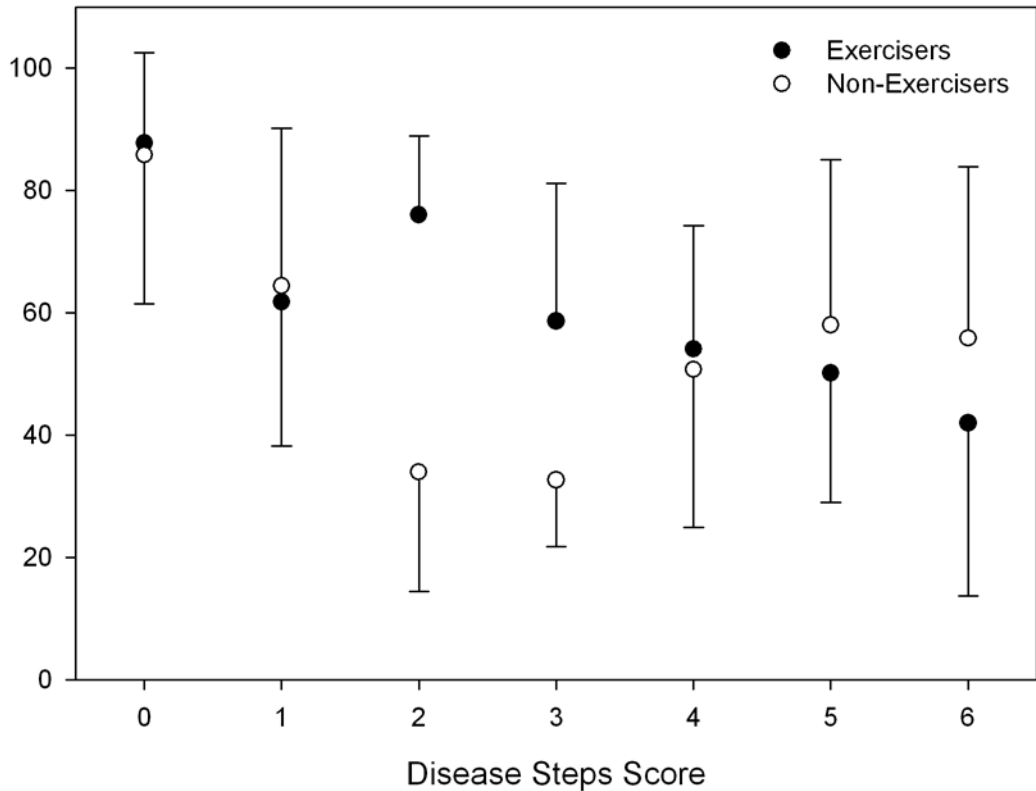

Supplement: MOESM6 [file 9560762]
